# Supplementary material for: Label-free electrochemical sensing of Hg 2+ using a Bi 2 WO 6 –DNA nanocomposite interface
Source: Royal Society of Chemistry journal article supplement (doi:10.1039/d5nj03874j), 2026-01-01
Supplement: d5nj03874j1.pdf [file d5nj03874j1.pdf]

## Label-Free Electrochemical Sensing of $\text{Hg}^{2+}$ Using a $\text{Bi}_2\text{WO}_6$ -DNA Nanocomposite

### Interface

Sankarkanna Gurusamy<sup>1</sup>, Ragunath Madhu<sup>2</sup>, Ramachandran. K<sup>3</sup>, Imran. K<sup>4</sup>, Wilson Jeyaraj<sup>1\*</sup>,  
Subrata kundu<sup>2\*</sup>

<sup>1</sup>Polymer electronics lab, Department of Bioelectronics and Biosensors, Alagappa University, Karaikudi, 630 003, Tamil Nadu, India.

<sup>2</sup>Electrochemical Process Engineering (EPE) Division, CSIR- Central Electrochemical Research Institute (CECRI), Karaikudi-630 003, Tamil Nadu, India.

<sup>3</sup>Department of Chemistry, Kangeyam Institute of technology, Nathakadaiyur, Kangeyam, Thirupur, India.

<sup>4</sup>Department of Chemistry, Madanapalle Institute of Technology & Science (MITS), Deemed to be University, Madanapalle, Andhra Pradesh, India-517326.

Corresponding author E-mail ID: [skundu@cecri.res.in](mailto:skundu@cecri.res.in) (S.K) and [wilson.j2008@yahoo.com](mailto:wilson.j2008@yahoo.com) (J.W).

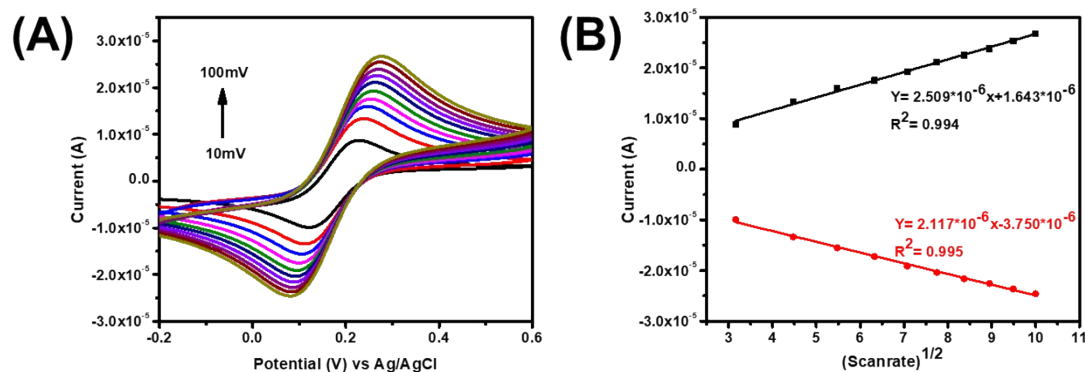

**Figure: S1** (A) different scan rate (10 mV – 100 mV) in the medium and (B) linear plot for the scan rate studies

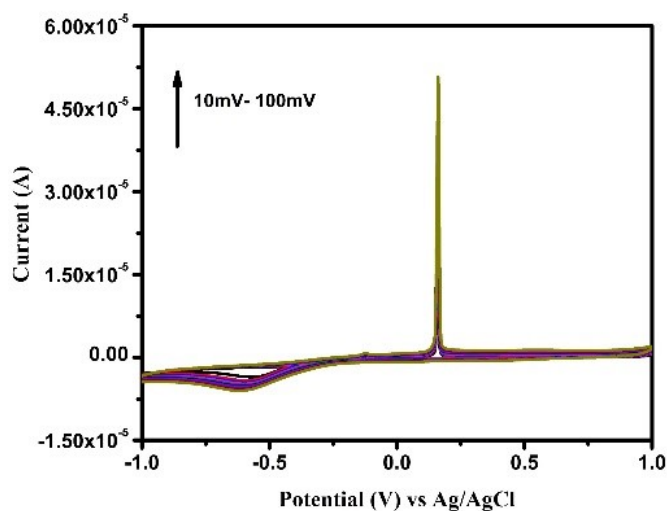

**Figure: S2** (A) Various scan rate for BW-DNA

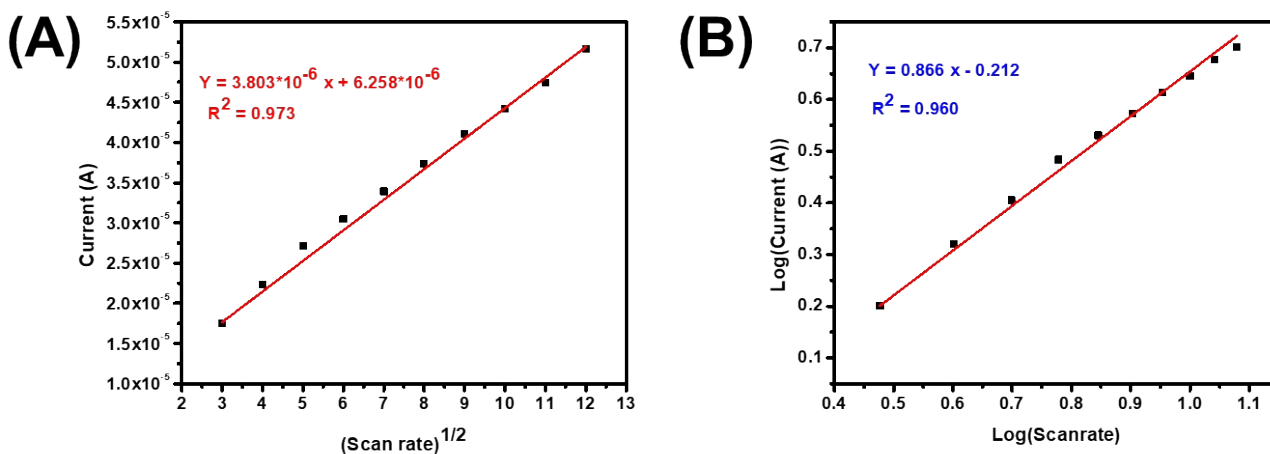

**Figure: S3** (A) Linear plot of Different scan rates for the BW – DNA modified electrode  
(B) Log (scan rate) vs Log (Current) Linear plot for the BW – DNA modified electrode

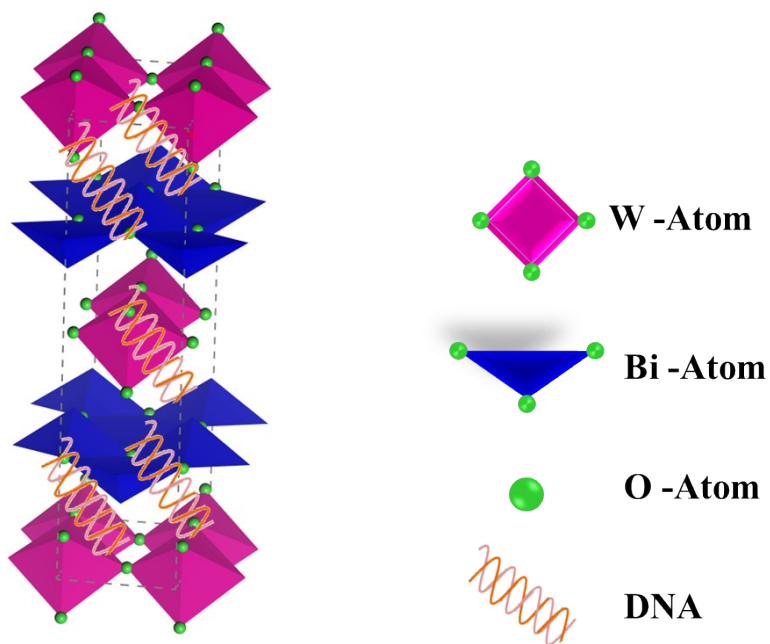

**Scheme S1:** Crystalline structure of BW-DNA
